# Supplementary material for: Photo-induced Manipulation and Relaxation Dynamics of Weyl-semimetals
Source: Research Square preprint supplement (doi:10.21203/rs.3.rs-5282540/v1), 2024-11-07
Supplement: Supplementary file 1 [file 60c8731d22bee979cafa347c.pdf]

Supplementary Information  
Photo-induced Manipulation and Relaxation  
Dynamics of Weyl-semimetals

Jakub Šebesta<sup>1,2</sup> and Oscar Grånäs<sup>1\*</sup>

<sup>1</sup>Materials Theory, Department of Physics and Astronomy, Uppsala  
University, Box 516, Uppsala, 751 20 , Sweden.

<sup>2</sup>IT4Innovations, VSB – Technical University of Ostrava, 17. listopadu  
2172/15, Ostrava-Poruba, 708 00, Czech Republic.

\*Corresponding author(s). E-mail(s): [oscar.granas@physics.uu.se](mailto:oscar.granas@physics.uu.se);  
Contributing authors: [jakub.sebesta@vsb.cz](mailto:jakub.sebesta@vsb.cz);

## 1 TaAs crystal structure

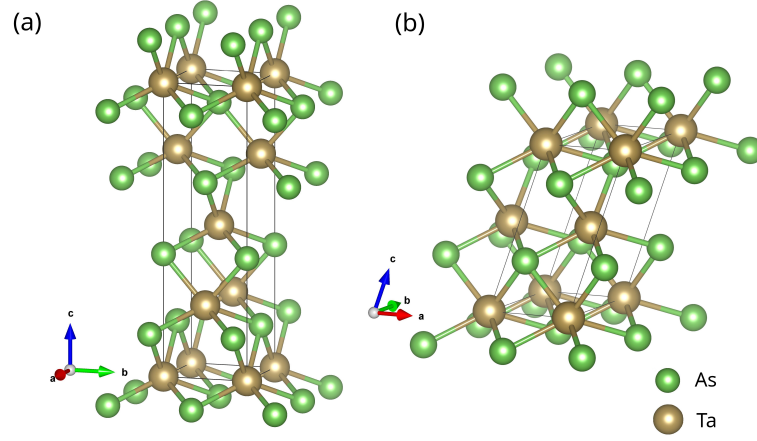

**Fig. SI1** TaAs crystal structure. (a) tetragonal cell, (b) primitive cell used in Elk calculations. [1]

## 2 Numerical stability with the respect to the time step

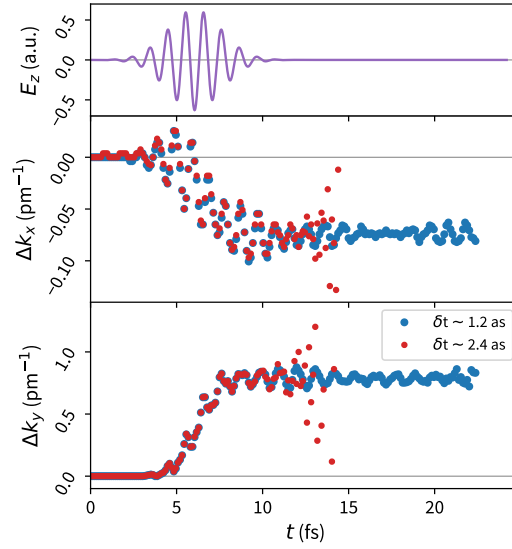

**Fig. SI2** Extracted Weyl node (WN) W1 position for different TDDFT time step length  $\delta t$ . Laser pulse  $P_A$  is considered.

### 3 Total phase difference convergence

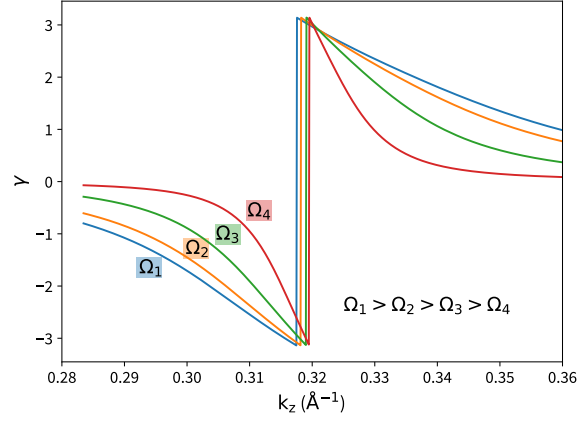

**Fig. SI3** The effect of the Wilson loop size on the integrated total phase difference  $\gamma$  as a function of the  $k_z$  position.  $\Omega_i$  denotes the area of the loop.

## 4 Dynamics in the k-space of the selected Weyl nodes across the Brillouin zone

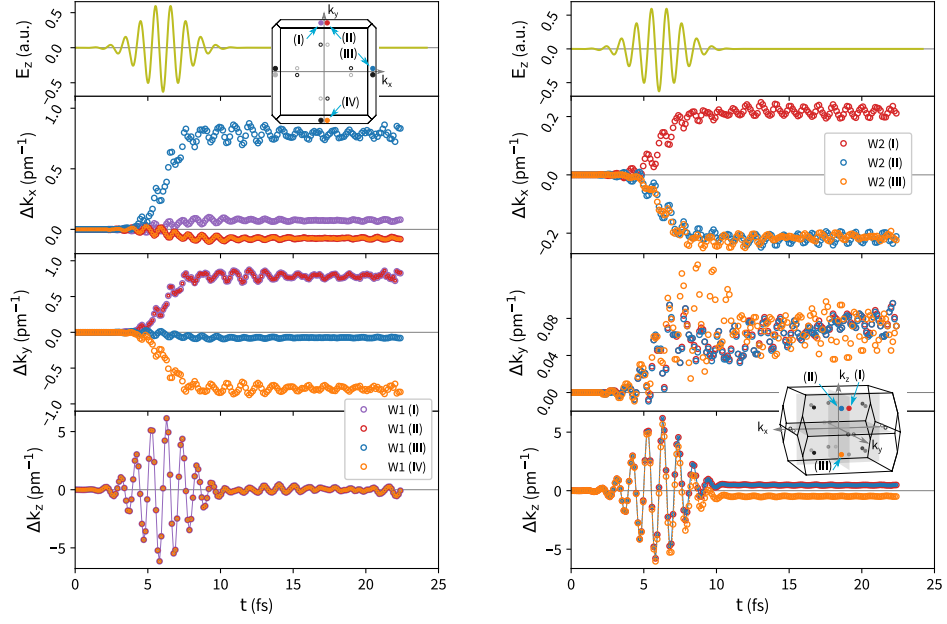

**Fig. S14** Comparison of time-dependent dynamics at different Weyl nodes. (left) W1 nodes, (right) W2 nodes. Laser pulse  $P_A$  is considered.

## 5 Inter Weyl node distance

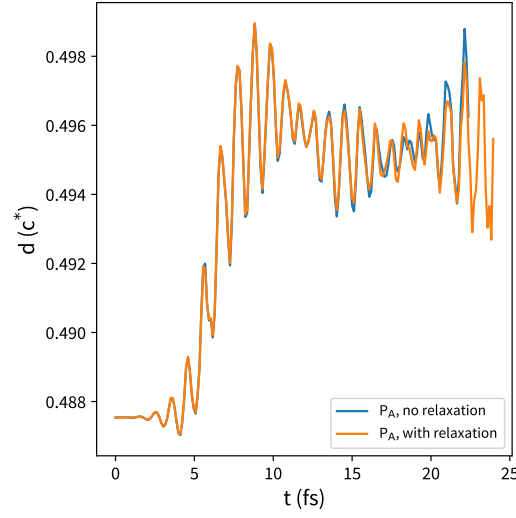

**Fig. SI5** Laser pulse induced change of the k-space distance between the nearest W1 and W2 Weyl nodes of the different chirality. Both data for the evolution with and without the atomic site relaxation are depicted. Laser pulse  $P_A$  is considered.

## 6 Time-dependent current

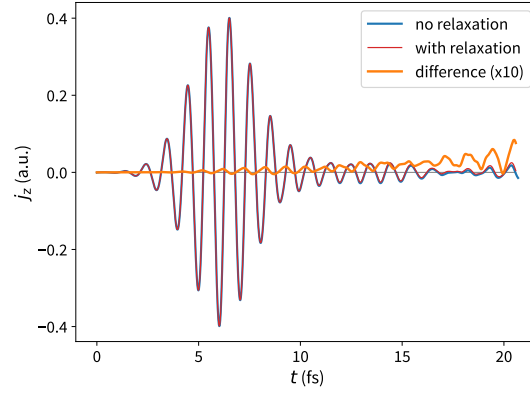

**Fig. SI6** Time-dependent laser pulse induced total current. The  $j_z$  component parallel to the field is depicted. (red) current with atomic sites relaxation, (blue) current without relaxation, (orange) difference magnified by the factor 10.

## References

- [1] Momma, K., Izumi, F.: *VESTA3* for three-dimensional visualization of crystal, volumetric and morphology data. *Journal of Applied Crystallography* **44**(6), 1272–1276 (2011) <https://doi.org/10.1107/S0021889811038970>
